# Supplementary material
Source: publisher site journal article supplement (https://www.dovepress.com/article/245575)
Supplement: Supplementary file 1 [file get_supplementary_file.php]

| **Table S1**: Basic characteristics of 4 ICC cohorts from GEO | | | | | |
| --- | --- | --- | --- | --- | --- |
| **Cohort ID** | **Publication year** | **Region** | **Platform** | **Number of samples** | |
| **Nontumor** | **Tumor** |
| GSE81948 | 2017 | Region (non-Asia) | GPL6244 | 5 | 15 |
| GSE76311 | 2015 | Region (non-Asia) | GPL17586 | 92 | 91 |
| GSE32958 | 2012 | Region (non-Asia) | GPL6244 | 7 | 16 |
| GSE31370 | 2012 | Region (Asia) | GPL10558 | 5 | 6 |

**Abbreviations:** MANF, Mesencephalic astrocyte-derived neurotrophic factor; ICC, intrahepatic cholangiocarcinoma, GEO, gene expression Omnibus.
